# Supplementary material for: Analysis of Predictive Risk Factors in Aquaporin-4-IgG Positive Highly Active Neuromyelitis Optica Spectrum Disorders
Source: Frontiers journal article supplement (doi:10.3389/fneur.2021.731835), 2021-08-26
Supplement: Table_2.xls [file Table_2.xls]

## Sheet: 5.25
leuckocytes	group	Erythrocyte	Hemoglobin	Lymphocyte	Glycosylated hemoglobin	Hcy	Cerebrospinal fluid leukocyte counts	Cerebrospinal fluid protein concentration	IgG index	24h IgG synthesis	age	sex	smoking	alcohol	Hypertension	Diabetes	Coronary heart disease	Cerebrovascular disease	Malignancy	Connective tissue disease	Optic neuritis	Transverse myelitis	Corticosteroid	Intravenous immunoglobulin	Immunosuppressant	Hepatic dysfunction	Renal dysfunction	High triglyceride	High total	ANA	Thyroid peroxidase / thyroglobulin antibodies	EDSS	Folic acid	B12
7	1	4.04	115	1.9	5.77	9.88	6	460	0.79	4.09	45	0	0	0	0	0	0	0	1	0	0	1	1	1	0	0	0	0	cholesterol,	0	0	2	4.7	200
14.9	1	4.14	140	0.3	6.04	22.51	90	885	0.82	68.4	43	0	0	0	0	0	0	0	0	0	0	0	1	0	0	0	0	0	0	0	0	5	5.2	230
6.7	1	4.13	120	2	5.44	15.31	7	550	0.85	16.3	20	0	0	0	0	0	0	0	0	0	1	0	1	0	0	0	0	1	1	0	1	3	10.36	548.4
17.8	1	4.49	109	4.2	7.23	25.34	10	412	0.75	3.56	22	0	0	0	0	0	0	0	0	1	0	1	1	0	1	1	0	0	0	1	0	5	10.2	549
6.9	1	3.71	110	0.8	6.83	18.8	3	786	0.8	28.43	24	0	0	0	0	0	0	0	0	0	1	1	1	0	0	0	0	0	1	0	0	5	8.98	378
4.1	1	2.2	79	3.2	5.67	31.2	12	465	0.56	-2.3	43	0	0	0	0	0	0	0	0	1	1	0	1	0	1	0	0	0	0	1	0	8.5	5.5	323
4.1	1	4.33	128	1.4	5.2	12.14	8	259.2	0.73	1	55	0	0	0	0	0	0	0	0	0	1	1	1	0	0	0	0	0	0	0	0	4	5.4	245
6.64	1	4.01	127	1.62	6.1	11.98	70	367.5	0.81	8.44	59	0	0	0	1	0	0	0	1	0	0	1	1	0	1	1	0	1	0	0	0	5.5	15.07	642
7.23	1	3.1	101	1.7	8.99	18.3	21	398	1.33	10.12	52	1	0	0	0	1	0	0	0	0	1	1	1	0	0	0	0	0	0	1	1	8	2.4	1361
5	1	4.25	126	1.6	6.07	15.3	5	510	0.91	15.23	59	0	0	0	0	0	0	1	0	0	0	1	0	0	1	0	0	0	0	0	0	2	4.1	685
9.31	1	4.31	133	1.13	6.92	18.9	6	489	0.84	0	73	0	0	0	1	1	0	1	0	0	1	0	1	0	0	0	1	0	1	1	0	8	9.8	641
2.29	1	3.33	102	1.03	4.79	13.85	2	283.4	0.54	15.21	47	0	0	0	0	0	0	0	0	0	1	0	1	0	1	0	0	0	0	0	0	4	7.74	412.7
7.7	1	3.91	124	2	7.23	9.5	4	192.1	1.35	90.69	25	0	0	0	0	0	0	0	0	0	1	1	1	0	0	0	0	0	0	0	0	2	3.4	669.2
4.6	1	3.01	94	0.7	5.79	10.57	12	289	1.44	2.2	51	0	0	0	0	0	0	0	0	1	0	1	1	0	1	0	0	0	0	1	0	2	3.3	1223
10.23	1	3.45	111	1.34	6.6	21.2	8	330	0.56	4.5	23	0	0	0	0	0	0	0	0	0	1	1	1	0	0	0	0	0	0	1	1	4	9.8	594
13	1	4.4	136	2.7	6.45	22.45	6	425	0.61	0	13	1	0	0	0	0	0	0	0	0	0	0	1	0	0	1	0	0	0	0	0	7	7.74	714.5
6.9	1	5.26	147	1.9	5.56	4.6	16	280	1.68	5.5	13	0	0	0	0	0	0	0	0	0	0	0	1	1	0	1	0	1	1	0	0	4	13.79	595
6.7	1	4.11	132	1.9	5.71	28.34	114	651	0.67	9.67	56	0	0	0	0	0	0	0	0	0	1	1	1	0	0	0	0	0	0	0	0	6	5.82	141.5
9.6	1	3.87	130	0.5	5.5	6	4	770.6	0.84	31.41	55	1	0	0	0	0	0	0	0	1	1	1	1	1	0	0	0	0	0	1	0	5	6.86	112
7.4	1	4.78	138	3.17	5.6	15.78	242	391	1.23	24.2	7	0	0	0	0	0	0	0	0	0	0	1	1	0	0	0	0	0	0	0	0	5	6.6	241
5.5	1	4.62	138	0.77	5.23	5.07	44	797.7	1.17	35.84	30	0	0	0	0	0	0	0	0	0	1	0	1	1	0	0	0	0	0	0	0	5.5	1.7	496.2
13.2	1	3.88	105	1.25	5.2	21.99	8	246.5	0.6	5.68	30	0	0	0	0	0	0	0	0	0	0	1	1	0	1	0	0	0	0	0	0	6	2.96	561
8.9	1	3.81	117	2.1	5.81	12.9	8	560	0.63	6.33	62	0	0	0	1	0	0	0	0	1	1	0	1	0	0	0	0	0	0	1	1	6	15.66	421.8
9.2	1	4.26	124	1.56	6.53	16.7	40	498	0.39	3.2	13	1	0	0	0	0	0	0	0	0	0	1	1	1	0	0	0	0	0	0	0	8.5	7.97	122
6.9	1	4	127	1.9	6.02	7.91	12	202.6	0.76	5.11	32	0	0	0	0	0	0	0	0	0	1	1	1	1	0	0	1	1	0	0	0	5	5.8	549.5
16.9	1	4.35	131	1.9	6.14	19.2	10	300.5	4.69	6.34	65	0	0	0	0	0	0	0	0	0	0	1	1	0	0	0	0	0	0	0	0	6.5	4.91	621
5.3	1	4.67	136	1.6	5.04	20.81	7	469	0.77	0	47	0	0	0	0	0	0	0	0	0	1	0	1	0	1	0	0	0	0	0	0	5	6.4	812
6.8	1	3.12	108	3.12	5.35	24.23	12	679	0.63	10.23	26	0	0	0	0	0	0	0	0	1	1	1	1	0	1	0	0	0	0	1	0	5	4.7	425.3
6.2	1	4.03	119	2	5.53	16.35	45	621.6	0.56	6.35	17	1	0	0	0	0	0	0	0	0	0	0	1	0	0	1	0	1	0	0	0	4	9.47	442
7.2	1	4.14	114	2	6.34	15.3	23	421.9	0.51	21.61	51	0	0	0	0	0	0	0	0	0	0	0	1	0	1	0	0	0	1	1	0	4	6.97	831.5
7.1	1	4.24	140	1.45	4.25	11.2	2	291.9	0.54	0.1	68	0	0	0	1	0	0	0	0	0	0	0	1	0	0	0	0	0	0	0	0	3	9.58	1182
4	1	3.97	116	1.1	5.4	10.41	4	200	0.7	3.05	44	0	0	0	0	0	0	0	0	0	0	1	1	0	0	0	0	0	0	0	0	5	17.8	1026
8.7	1	4.53	140	2.66	6.7	10.42	2	461.7	0.51	0	47	1	1	1	0	1	0	0	0	0	0	1	1	0	0	1	0	0	0	0	0	6	6.07	241
7	1	4.53	114	2.9	5.2	8.89	6	426	0.81	8.54	38	0	0	0	0	0	0	0	0	0	1	1	1	1	0	0	0	1	1	0	0	4	8.12	1196
7.1	1	4.06	131	1.47	5.8	11.8	8	289	1.12	23.1	15	0	0	0	0	0	0	0	0	0	0	1	0	0	0	0	0	0	0	0	0	4	10.7	766.6
14.7	1	4.63	141	2.85	6.11	19.55	23	411	0.98	5.6	50	0	0	0	0	0	0	0	0	0	0	0	1	0	0	0	0	0	0	0	0	6	4.3	306.4
20.5	1	4.64	136	1.56	5.84	14.84	25	1023	1.07	12.02	64	0	0	0	0	0	0	0	0	0	0	1	1	0	0	0	0	1	0	1	0	8	15.6	704.8
11.4	1	4.63	139	1.22	5.35	19.23	32	1025	0.78	0	16	0	0	0	0	0	0	0	0	0	1	0	1	0	0	0	0	0	0	0	0	6	12.34	560.1
6.1	1	4.17	134	2.6	6.23	27.34	32	768	0.66	2.11	8	0	0	0	0	0	0	0	0	0	0	1	0	1	0	1	0	0	0	0	0	2	6.12	990
6.5	1	3.74	118	2	6.11	6.75	16	328	0.78	0	32	0	0	0	0	0	0	0	0	0	0	1	1	0	0	0	0	0	0	1	0	6	7.14	460
5.5	1	4.74	140	1.93	4.74	6.23	52	327.8	0.66	4	18	0	0	0	0	0	0	0	0	0	0	0	1	0	0	0	0	0	1	0	0	5	4.2	746.8
8.9	1	4.66	141	3.3	5.77	16.34	12	353	1.05	16.07	30	1	0	0	0	0	0	0	0	0	1	1	1	0	0	0	0	0	0	0	0	6	2.6	463
5.5	1	3.9	130	1.32	5.3	5.49	13	960	1.12	-2.4	28	0	0	0	0	0	0	0	0	0	1	1	1	0	0	0	0	0	0	0	0	5	7.6	319.3
9.7	1	4.04	121	1.23	6.62	11.69	16	1461	0.17	31.92	48	0	0	0	0	1	0	0	0	0	0	1	1	0	1	0	0	0	0	0	0	7	3.6	252
7.9	1	4.52	141	1.1	5.7	9.16	2	679.8	0.47	0	46	1	0	0	0	0	0	0	0	0	1	1	1	0	0	0	0	0	0	0	0	5	5.4	937
5.8	1	4.28	123	1.2	6.3	13.01	8	347	0.8	11.18	53	0	0	0	0	0	0	0	0	0	1	1	1	0	0	0	0	0	1	1	0	6	6	345
5.6	1	3.87	116	3.6	5.6	11.1	8	316	0.75	3.12	51	0	0	0	0	0	0	0	0	0	0	1	1	0	1	0	0	0	0	0	0	7	4.5	461
7.2	1	4.4	105	3.5	5.2	9.26	22	293.7	0.55	0	16	0	0	0	0	0	0	0	0	0	0	1	1	0	0	0	0	0	0	0	0	5	5.23	519.2
3.9	1	4.32	134	2.3	5.6	31.23	14	620	1.12	12.31	22	0	0	0	0	0	0	0	0	0	1	1	1	0	0	0	0	0	1	1	0	6	3.64	242
10.3	1	4.4	133	2.3	4.74	44.2	15	590	0.53	21.23	22	0	0	0	0	0	0	0	0	0	0	1	1	0	1	0	0	0	0	0	0	8	6.2	957
11.4	1	4	116	3.1	5	7.71	26	962	1.13	46.3	19	0	0	0	0	0	0	0	0	0	1	1	1	0	1	1	0	0	0	0	0	8	3.29	412
4.8	1	4.25	92	2.3	5.67	7.34	12	602	0.62	10.23	44	0	0	0	0	0	0	0	0	0	0	1	1	0	1	0	0	0	0	0	0	4	1.7	823
3.2	1	4.78	116	0.4	6.78	12	56	386	0.07	88.91	44	0	0	0	0	0	0	0	0	0	1	1	1	0	0	0	0	0	0	0	0	8	3.6	986.8
7.5	1	4.26	75	1.38	4.6	13.4	2	227.2	0.69	107.28	35	0	0	0	0	0	0	0	0	0	0	1	1	0	0	0	0	0	0	1	0	6	7.2	892
3.3	1	3.54	116	1.2	5.4	11.17	4	210.6	0.6	2.87	39	0	0	0	0	0	0	0	0	0	0	1	1	0	0	0	0	0	0	0	0	4	2.5	129
7.2	1	3.95	123	2.9	5.9	15.2	4	677	0.62	7.57	44	0	0	0	0	0	0	0	0	0	1	1	1	0	1	0	0	0	0	0	0	6.5	10.9	636
5.24	1	3.87	129.9	1.56	5.36	9.27	6	398.1	0.52	2.83	40	0	0	0	0	0	0	0	0	0	0	1	1	0	0	0	0	0	1	0	0	4.5	13.5	872
5.5	1	3.81	113	1.5	5.8	10.46	30	685	0.71	13.06	41	0	0	0	0	0	0	0	0	0	0	1	1	0	0	0	0	0	0	0	0	5	2.8	579.2
4	1	4.14	119	1.26	6	9.23	8	328.6	0.77	3.69	28	0	0	0	0	0	0	0	0	0	1	1	1	0	1	0	0	0	0	0	0	5	4.7	322.1
6.4	1	4.62	144	2.7	7	9.34	35	768	0.45	-1.2	53	1	1	0	0	0	0	0	0	0	0	1	1	0	1	0	0	0	0	0	0	4	13.46	421
3.1	1	4.14	137	1.7	5.8	18.2	7	411	0.56	15.24	30	0	0	0	0	0	0	0	0	0	0	1	1	0	0	0	0	1	1	0	0	5	8.23	981
5.7	1	4.1	131	3.9	5.75	16.69	2	329	1.01	8.83	20	1	0	0	0	0	0	0	0	1	0	1	1	1	1	0	0	1	1	1	0	3	3.3	342
12	1	4.57	136	3.5	7.2	9.46	0	307	0.57	-0.36	50	0	0	0	0	0	0	0	0	1	0	1	0	0	0	0	0	0	0	1	0	8	12.28	251
6	1	4.24	129	2.4	6.35	21.23		653	0.52	11	34	0	0	0	0	0	0	0	0	1	0	1	1	0	0	0	0	0	0	1	0	7	20.9	747
6.7	1	4.1	129	1.2	5.8	11.5	48	852	0.64	16.91	63	0	0	0	0	0	0	0	0	0	0	1	1	0	0	0	0	0	1	0	0	8	6.1	362
10.1	1	4.78	133	3.6	6.13	12.43	32	535	0.7	10.71	21	0	0	0	0	1	0	0	0	0	1	1	1	0	0	0	0	0	0	0	0	6	4.4	284
7.24	1	2.1	98	3.3	5.7	16.3	21	490	0.72	0.57	54	0	0	0	0	0	0	0	0	0	0	1	0	0	0	0	0	0	0	0	0	5	7.82	957
3.5	1	4.65	140	3.1	4.7	13.39	6	528	0.77	27.08	57	0	0	0	0	0	0	0	0	1	0	1	1	0	0	0	0	0	0	1	0	8	3.8	1062
9	1	4.45	133	3.7	6.2	18.4	14	662.7	0.64	7.8	67	1	1	1	1	1	1	0	0	0	1	1	1	0	1	1	0	0	1	0	0	8	5.21	142
7.7	1	3.93	124	3.2	9	21.24	2	364.7	0.65	6.41	63	0	0	0	0	0	0	0	0	1	0	1	1	0	0	0	0	0	0	1	0	7	10.23	690.08
5	1	3.59	121	1.7	5	18.23	12	467	0.68	6.88	49	0	0	0	0	0	0	0	0	0	1	1	1	0	1	0	0	1	1	0	0	4.5	13.9	421
10.1	1	4.76	141	2.4	5.77	15.2	6	559	0.28	9.23	50	0	0	0	1	1	0	0	0	1	0	1	1	0	0	0	0	0	0	1	1	8	19.75	922.3
6.4	1	4.22	123	2.4	5.7	14.23	6	879.1	1.23	14.48	15	0	0	0	0	0	0	0	0	0	0	1	1	0	1	0	0	0	0	0	0	6	14.96	708
13.1	1	4.27	132	1.8	6	23.18	8	670	0.78	12.2	50	0	0	0	0	0	0	0	0	0	0	1	1	0	1	0	0	0	0	0	0	1	17.54	447
8.6	1	4.36	137	3.1	6.2	19.23	13	887	0.93	8.67	45	0	0	0	0	0	0	1	0	1	1	1	1	0	1	0	0	0	1	1	0	5	7.9	234
8.4	1	5.19	150	1.3	5.23	15.14	20	576	1.39	31.22	56	0	0	0	1	0	0	0	0	0	0	0	1	0	1	0	0	0	0	0	0	6	13.5	244
4.3	1	4.21	128	3.9	5.97	43.25	25	1210	0.55	12.2	46	1	1	0	0	0	0	0	0	0	1	1	1	0	0	0	0	0	0	0	0	2.5	15.9	1048.4
4.7	1	4.16	129	1.39	5.67	12.68	4	377.9	0.39	22.13	39	0	0	0	0	0	0	0	0	0	0	0	1	0	0	0	0	0	0	0	0	3	8	946
5.8	1	4	123	1.77	5.65	17.01	30	337	0.62	11.25	23	0	0	0	0	0	0	0	0	0	0	1	1	0	1	0	0	0	0	0	0	4	13.23	1781
4.7	1	3.58	115	0.8	5.92	12.3	47	339	0.56	1.2	48	0	0	0	0	0	0	0	0	0	1	1	1	0	1	1	0	0	0	0	0	6.5	5.92	837.6
6.5	1	4.55	126	1.2	5.26	13.2	25	520	0.9	0.23	47	0	0	0	0	0	0	0	0	0	0	1	1	0	0	0	0	0	0	0	1	7	15.35	566
4.4	1	3.14	96	0.8	5.2	9.21	81	288	0.68	7.3	47	0	0	0	0	0	0	0	0	0	0	0	1	0	0	0	0	0	0	0	0	2.5	4.5	356
6.9	1	4.19	127	2.94	6.1	9.89	5	392	0.74	3.5	17	0	0	0	0	0	0	0	0	0	1	1	1	0	0	0	0	0	0	0	0	4	6.2	599
5.5	1	4.03	126	1.22	4.67	18.23	4	410	0.59	4.6	63	0	0	0	0	0	0	0	0	0	0	0	1	0	1	0	0	0	0	0	0	5	7.36	149.3
3.4	1	3.1	105	1.4	6.78	33.24	16	386	0.58	10.92	84	0	0	0	0	0	0	0	0	0	1	1	1	0	0	0	0	1	1	1	0	7	6.35	836.6
5	1	4.03	122	1.04	5.7	17.2	22	320	0.77	3.6	66	0	0	0	0	0	0	0	0	0	1	0	1	0	0	0	0	0	0	0	0	5	3.7	352
5.8	1	3.81	121	1.7	5.2	10.2	19	570	1.24	3	44	0	0	0	0	0	0	0	0	0	1	1	1	0	0	0	0	0	0	1	1	4	12.2	926.3
10.6	1	4.48	123	2.48	5.87	9.01	32	654	0.78	19.23	43	0	0	0	0	0	0	0	0	0	0	1	1	0	1	0	0	0	0	0	0	5	8.85	539
5.7	1	4.47	142	1.84	5.8	18.5	6	320	0.46	0	49	0	0	0	0	0	0	0	0	0	0	0	1	0	0	0	0	1	0	0	0	4.5	3.5	124
5.7	1	4.06	109	1.8	6.24	19.1	2	276	0.8	1.97	27	0	0	0	0	0	0	0	0	0	1	1	1	0	0	0	0	0	0	0	0	4	2	255
6.6	1	4.81	147	1.6	5.3	14.2	180	616	0.73	7.99	26	1	0	0	1	0	0	0	0	0	1	0	1	0	0	0	0	0	0	0	0	7	4.09	551.2
6.4	1	4.08	125	1.9	5.87	9.01	18	665	0.58	7.68	42	0	0	0	0	0	0	0	0	1	0	1	1	0	0	0	0	0	0	1	1	8	25.6	1351.2
5.67	1	4.26	132.6	1.42	5.7	8.68	6	474	0.64	10.23	24	0	0	0	0	0	0	0	0	1	0	1	0	0	1	0	0	1	0	0	0	4	11.34	1359.3
10.6	1	3.93	114	1.99	5.6	8.21	4	326.9	0.82	16.01	29	0	0	0	0	0	0	0	0	0	1	0	1	0	1	0	0	0	0	0	0	7	5.6	1643
9.14	0	4.61	150.8	2.1	6.39	6.82	4	189.7	0.56	-2.65	60	0	0	0	0	0	1	0	0	0	0	1	1	0	1	0	0	0	0	0	0	6	7.3	374.6
4.62	0	4.08	125	1.82	5.4	20.48	6	372	0.84	3.17	29	0	0	0	0	0	0	0	0	0	0	1	1	0	1	1	0	0	1	0	0	3	13.68	414
5.3	0	4.33	129	1.37	6.1	10.09	0	590	0.79	4.04	16	0	0	0	0	0	0	0	0	0	0	1	1	0	0	0	0	0	0	1	0	3	8.56	468.9
2.4	0	4.46	136	1	5.91	7.08	8	382	0.81	15.31	42	0	0	0	0	0	0	0	0	0	0	1	1	0	0	0	0	0	0	0	1	3.5	3.26	990
7.3	0	4.18	128	1.6	5.2	5.36	4	186.9	0.51	0	32	0	0	0	0	0	0	0	1	0	1	1	1	0	1	0	0	0	0	0	0	3	10.2	361.4
8.2	0	3.7	118	2.7	6.02	8.58	2	234.9	0.63	0	46	0	0	0	0	0	0	0	0	0	1	1	0	0	0	0	0	0	0	0	1	2	11.2	523
6	0	4.56	143	2.2	5.23	28.59	8	284	0.75	1.97	52	0	0	0	0	0	0	0	0	0	0	1	1	0	0	0	0	1	1	0	0	5.5	15.44	235
7.2	0	3.69	113	0.92	5.65	5.5	2	132.7	0.65	0	14	0	0	0	0	0	0	0	0	0	0	1	1	0	0	0	0	0	0	0	0	7.5	13.83	445.9
12.9	0	4.07	125	1.1	7.03	10.87	2	421.8	0.61	1.71	45	1	0	0	1	0	0	0	0	0	1	1	1	0	0	0	0	0	1	0	0	6	11.27	134
4	0	4.99	141	3.6	5.82	13.93	12	424.5	0.52	2.34	31	1	0	0	0	0	0	0	0	0	0	1	1	1	1	0	0	0	0	0	0	5	6.71	603.8
7.6	0	4.08	113	2.8	8.3	14.52	4	346.1	0.68	1.6	54	0	0	0	0	1	0	0	0	0	1	1	1	0	1	0	0	1	1	1	0	3	16.24	562
14.7	0	4.87	153	1.2	6.3	21.16	2	264.2	0.75	0.98	44	1	1	0	0	0	0	0	0	0	0	1	1	0	0	0	0	0	0	0	0	6	3.9	497.6
4.4	0	4.38	114	2.6	5.53	13.1	192	210	0.93	8.74	59	0	0	0	0	0	0	0	0	0	0	1	1	0	0	0	0	0	0	0	0	6	16.45	533.6
7.2	0	3.09	118	2.9	5.46	19.81	0	452	0.71	0.47	48	0	0	0	0	0	0	0	0	0	1	1	1	0	0	0	0	0	0	1	0	3	14.9	874
5.1	0	4.56	130	3.7	5.58	7.77	2	383.9	0.55	2.32	36	0	0	0	0	0	0	0	0	0	0	1	1	0	0	0	0	0	0	0	0	5.5	9.75	403.3
8.8	0	4.18	129	1.9	5.39	11.34	0	398.7	0.76	6.33	68	0	1	0	1	1	0	0	0	0	0	1	1	0	0	0	0	1	1	0	1	5	4.2	1241.4
6.9	0	4.91	146	2.1	5.23	10.52	0	189	0.65	-1.23	30	1	1	0	1	0	0	0	0	0	1	1	1	0	0	0	0	1	1	0	0	6	7.3	156
7.2	0	4.27	132	2.3	6.47	11.95	2	315.1	0.51	3.56	54	0	0	0	0	0	0	0	0	0	1	1	1	0	0	1	0	0	0	0	0	6	12.67	1142
4.9	0	3.9	122	1.4	5.78	9.1	72	582.6	0.56	4.11	62	0	0	0	0	0	0	0	0	0	0	1	1	0	1	0	1	0	0	0	1	3	3.25	713.4
1.7	0	4.15	116	4.5	5.43	9.43	26	305	0.74	3.8	40	0	0	0	0	0	0	0	0	0	0	1	1	0	0	1	0	0	0	0	0	5	7.43	401
5.4	0	3.99	125	2.1	4.99	17.75	2	269	0.76	2.52	20	1	1	1	0	0	0	0	0	0	1	1	1	0	1	0	0	0	0	0	0	5.5	4.67	2082
7.7	0	3.94	128	2.9	4.78	11.06	18	632.1	0.55	2.29	54	0	0	0	0	1	0	0	0	0	0	1	1	1	0	0	0	0	0	0	0	7	9.7	463.5
5.94	0	3.76	120	2.3	6	11.14	6	389.7	0.53	5.5	51	0	0	0	0	0	0	0	0	0	0	1	1	0	1	0	0	1	0	1	0	6	2.3	789
8.9	0	4.71	112	2.9	6.72	9.53	0	501	1.14	16.45	43	0	0	0	0	0	0	0	0	0	1	1	1	0	0	0	0	0	0	0	0	5	13.21	498
8.4	0	4.41	135	2.4	5.8	14.59	2	118.1	0.53	0	59	0	0	0	1	0	0	0	0	0	1	1	1	0	0	0	0	0	0	0	0	4	5.7	268
4.7	0	4.11	130	2.7	5.73	9.1	2	500	1.07	15.91	37	1	0	0	0	0	0	0	0	0	0	1	1	1	0	0	0	1	0	0	0	5	5.93	467
5.27	0	4.18	121.6	2.1	5.28	13.08	2	286.9	4.66	2.8	31	0	0	0	0	0	0	0	0	0	0	1	1	0	1	0	0	0	0	1	0	6	6	819.2
7.5	0	3.9	119	1.7	5.31	9.35	3	192	0.51	0.89	43	0	0	0	0	0	0	0	0	0	0	1	1	0	0	0	0	0	0	0	0	6	14.4	518.3
5.4	0	4.41	115	3	5.8	7.06	12	592.5	0.57	0	51	0	0	0	0	0	0	0	0	0	1	1	0	0	1	1	0	0	0	0	0	6	4.9	1009.5
3.9	0	5.1	118	3.4	5.6	10.5	10	390	1.25	16.28	43	0	0	0	0	0	0	0	0	0	1	0	1	0	0	0	0	0	0	0	0	7	3.2	447.1
4	0	4.95	150	0.84	5.45	20.65	2	288.3	0.62	0.07	27	1	0	0	0	0	0	0	0	0	0	1	0			0	0	0	0	0	0	6	4.6	371.8
4.6	0	2.46	110	0.84	5.23	16.26	4	2116.2	0.55	31.26	57	0	0	0	1	0	0	0	0	0	0	1	1	0	0	0	0	0	0	0	0	8.5	6.75	408
6	0	4.56	123	2.41	5.8	14.58	10	211.9	0.56	0	22	0	0	0	0	0	0	0	0	0	1	1	1	0	0	0	0	0	0	0	0	6.5	4.81	890
9.41	0	4.34	134.8	3.02	5.46	7.61	2	200.5	0.53	0.81	36	0	0	0	0	0	0	0	0	0	1	1	1	0	1	0	0	0	0	0	0	5	10.58	788.7
3.8	0	4.17	122	0.8	5.73	11.81	2	386	0.78	-0.46	57	0	0	0	0	0	0	0	0	0	1	0	1	0	0	0	0	0	0	0	0	4	7.61	560.5
4.65	0	4.48	106	1.53	5.6	12.08	4	100	0.86	0	35	0	0	0	0	0	0	0	0	0	0	1	1	0	0	0	0	1	1	0	0	5	9.12	128
10.4	0	4.81	156	1.72	5.68	8.4	2	396.4	0.63	-1.45	61	1	0	0	1	0	0	0	0	0	0	1	1	0	0	0	0	0	0	0	0	8	8.9	595.6
6.4	0	4.14	129	1.25	5.3	9.24	4	259.2	0.59	0	52	0	0	0	1	0	0	0	0	0	0	1	1	0	1	0	0	0	0	0	0	7	13.81	532
8.7	0	4.52	132	1.1	5.4	10.23	36	958	0.51	3.28	33	1	0	0	0	1	0	0	0	0	0	0	1	0	1	0	0	0	0	0	0	5	6.9	356
3.2	0	4.03	127	2.05	5.87	9.37	4	331.2	0.66	2.69	54	0	0	0	0	0	0	0	0	0	1	1	0	0	0	0	0	1	1	0	0	6.5	10.92	438
5.7	0	3.81	129	1.4	5.4	7.17	0	339.5	0.66	1.37	45	0	0	0	0	0	0	0	0	0	0	0	1	0	1	0	0	0	1	0	1	7	5.9	313.9
7.25	0	4.25	132.1	1.72	6.08	10.57	24	593	0.53	23.74	54	0	0	0	0	0	0	0	0	0	1	0	1	0	0	0	0	0	0	0	0	7	12.58	414.6
6.8	0	5.02	148	1.7	5.6	12.76	2	435.2	0.55	0.33	70	0	1	1	0	0	0	0	0	0	1	0	1	0	0	0	0	0	0	0	0	5	5.61	516.2
5.63	0	4.5	136	0.59	5.45	11.2	6	358.4	0.61	4.19	47	0	0	0	0	0	0	0	0	0	0	1	1	0	0	0	0	0	0	0	0	8	10.25	255.3
4.55	0	3.98	127.7	1.51	6.1	10.52	4	186	0.51	-0.78	61	0	0	0	0	0	0	0	0	0	0	1	1	0	1	0	0	0	0	0	0	5	12.93	674
5.5	0	3.9	115	1.12	5	11.97	6	366.6	0.52	12.33	39	0	0	0	0	0	0	0	0	0	0	0	1	1	1	1	0	0	1	0	0	9	7.35	145
6.1	0	4.44	135	1.54	4.9	18.2	2	470	0.59	1.65	50	0	0	0	0	0	0	0	0	0	1	0	1	0	0	0	0	0	0	0	0	8	8.96	160.7
5.5	0	3.77	120	0.81	5.01	11.09	4	414.4	0.23	5.61	47	0	0	0	0	0	0	0	0	0	0	1	1	0	1	0	0	0	0	0	0	7.5	9.1	288.1
8.2	0	4.14	99	1.98	5.74	12.4	6	292.6	0.77	0.93	27	0	0	0	0	0	0	0	1	0	0	1	1	0	0	0	0	0	1	0	0	3	6.66	702.6
4.3	0	5	94	1.05	5.1	7.84	74	1188.1	0.18	0	42	0	0	0	0	0	0	0	0	0	0	1	1	0	1	1	0	0	0	0	0	7	8.9	526.3
5.3	0	4.14	123	1.64	5.4	14.63	4	141.1	0.58	0	40	0	0	0	0	0	0	0	0	0	0	1	0	0	0	0	0	0	0	0	0	3	3.4	112
10.6	0	4.95	146	2.84	6.4	14.93	270	719.5	0.61	7.63	28	0	0	0	0	0	0	0	0	0	1	0	1	0	0	0	0	0	0	0	1	6	7.1	262
10.3	0	5.18	155	0.85	8.2	7.74	4	240.9	0.68	1.55	28	0	0	0	0	1	0	0	0	0	0	1	1	0	0	0	0	1	1	0	0	3	4.6	222
6.7	0	4.1	129	1.2	5.8	11.5	48	852	0.64	16.91	63	0	0	0	0	0	0	0	0	0	1	0	1	0	0	0	0	1	0	0	0	8	2.7	536
4.3	0	3.57	118	1.77	5.43	15.6	2	192.7	0.62	0	54	0	0	0	0	0	0	0	0	0	0	1	1	0	1	0	0	0	0	0	1	3	5.6	791.2
7	0	3.62	113	0.9	6.09	21.49	0	649	0.72	12.73	33	0	0	0	0	0	0	0	0	0	0	1	1	0	1	0	0	0	1	0	0	7	16.3	356
4.2	0	3.88	118	0.65	5.7	8.87	4	255.9	0.66	1.49	55	0	0	0	0	0	0	0	0	0	1	0	1	0	0	0	0	0	0	0	0	4.5	6.39	456
6.1	0	3.66	116	3.44	5.82	8.52	2	272.2	0.51	-0.91	27	0	0	0	0	0	0	0	0	0	0	1	1	0	1	0	0	0	0	0	0	3	14.2	245
11.8	0	4.35	119	4.98	5.8	9.23	2	197.1	0.53	0	29	0	0	0	0	0	0	0	0	0	1	0	1	0	0	0	0	0	1	0	0	3	12.38	418
4.8	0	3.78	100	2.2	5.6	12.3	2	252.5	0.49	0	30	0	0	0	1	0	0	0	0	0	0	1	1	0	1	0	0	0	0	0	0	2	8.36	314
10.2	0	5.12	158	1.38	5.8	10.23	2	501.2	0.45	1.86	48	0	1	0	1	0	0	1	0	0	0	0	1	0	0	0	0	0	0	0	0	7	9.12	156
5.4	0	3.94	100	1.4	5.4	8.44	6	272.2	0.63	0.6	49	0	0	0	0	0	0	0	0	0	0	1	1	0	1	0	0	0	0	1	0	2	11.92	253.4
5.8	0	4.45	135	2.1	5.56	32.1	8	269	1.49	2.72	33	1	1	1	0	0	0	0	0	0	1	0	1	0	0	0	0	0	0	0	0	1.5	3.49	266
5.1	0	4.12	122	1.4	7.75	4.5	6	368	0.45	-4.72	60	0	0	0	1	0	1	0	0	0	1	0	1	0	0	0	0	1	1	0	0	5	9.68	392
3.2	0	3.68	73	1.16	5.65	7.68	2	197.1	0.42	-1.44	46	0	0	0	0	0	0	0	0	0	0	1	1	0	0	0	0	0	0	0	0	4	1.7	486
6	0	3.96	124.1	2.12	5.7	14.06	16	265	0.46	0	18	0	0	0	0	0	0	0	0	0	0	0	1	0	1	0	0	0	0	0	0	2	2.8	852
6.2	0	3.5	115	2.15	5.2	10.35	0	195	0.6	0	21	0	0	0	0	0	0	0	0	0	0	1	1	0	0	0	0	0	1	1	0	3	16.52	438
3.16	0	3.61	119	1.16	5.33	10.79	2	423.1	0.57	0	62	0	0	0	0	0	0	0	0	0	0	1	1	0	0	0	0	0	0	0	0	5	9.48	1087
7.1	0	5.15	149	0.35	5.9	12.23	76	723	0.35	0	34	0	0	0	0	0	0	0	0	0	1	0	1	0	0	0	0	0	0	1	0	9.5	17.6	103
3.7	0	3.62	111	1.18	6.85	10.78	4	843.5	4.53	61.36	62	0	0	0	1	0	1	0	0	0	0	0	1	0	0	0	0	1	1	0	0	6	3.88	573
10.4	0	3.09	91	1.68	5.23	26.54	14	968.4	0.34	97.24	26	0	0	0	0	0	0	0	0	0	0	1	1	0	0	0	0	0	0	0	0	8.5	6.9	215
4.6	0	3.83	127	0.92	5.35	9.3	2	557.3	0.63	4.62	60	0	0	0	1	0	0	1	0	0	0	1	1	0	0	0	0	0	0	0	0	8	10.69	761
3.5	0	4.11	131.6	1.14	5.67	11.47	2	271.4	0.54	0	58	0	0	0	0	0	0	0	0	0	0	1	1	0	1	0	0	0	0	0	0	4.5	13.2	743
8.11	0	4.11	124.2	1.69	5.13	12.3	12	558.4	0.32	7.25	41	0	0	0	0	0	0	0	0	0	1	0	1	0	1	1	0	0	0	0	0	6	9.2	356
6.7	0	4.19	121	1.9	5.63	8.76	74	416.1	0.8	5.49	54	0	0	0	0	0	0	0	0	0	1	0	1	1	0	0	0	0	0	0	0	8	5.88	1091.7
6.1	0	4.55	142	1.4	5.74	10.31	0	191	0.67	-0.66	52	0	0	0	0	0	0	0	0	0	1	0	1	0	1	0	0	0	1	0	0	3	5.54	2105
8.1	0	4.25	139	3.15	5.74	15.3	2	244.9	0.71	1.38	27	0	0	0	0	0	0	0	0	1	0	1	1	0	0	0	0	1	1	1	0	3	2.64	956
6.5	0	3.74	106	3.6	6.3	11.34	2	203.5	0.42	-3.45	44	0	0	0	0	0	0	0	0	0	0	1	0	0	1	0	0	0	0	0	0	5	3.6	502
7.2	0	5.67	179	2.04	5.7	8.78	34	257.7	0.84	2.83	17	0	0	0	0	0	0	0	0	0	0	1	1	0	1	0	0	0	0	0	0	4	12.2	674
6.2	0	4.81	143	2.8	4.7	29.43	60	192	0.68	1.67	31	1	0	0	0	0	0	0	0	0	1	0	0	1	0	0	0	0	1	0	0	3	15.1	356
5.9	0	4.2	121	2.3	5	13.32	34	517.2	0.43	0	33	0	0	0	0	0	0	0	0	0	0	1	1	0	0	0	1	0	0	0	0	3	8	461
6.2	0	4.51	126	3.7	5.8	12.43	6	297.7	0.84	4.99	49	0	0	0	0	0	0	0	0	0	0	1	1	0	1	0	0	0	0	0	0	5	10.65	417
5.88	0	3.4	108.4	1.39	6.08	8.5	4	250.9	0.35	-12.58	57	0	0	0	0	0	0	0	0	0	0	1	1	0	0	0	0	1	1	0	0	6.5	4.8	866
5.2	0	4.27	130	1.7	6.9	10.86	6	665	0.53	2.16	67	1	0	0	0	0	0	0	0	0	0	1	1	0	1	0	0	0	1	0	0	3	9.1	439
14.2	0	5.24	153.5	0.85	8.35	7.72	52	579.8	0.55	1.62	45	0	0	0	1	1	0	0	0	0	1	0	1	1	0	0	0	0	0	0	0	8	3.4	245
4.4	0	4.13	117	1	6.34	12.54	2	305	0.84	2.58	53	0	0	0	0	0	0	0	0	0	0	1	1	0	1	0	0	1	1	1	0	3	5.88	669
6.2	0	5.19	164	1.49	5.6	13.31	72	619.4	0.54	2.37	47	0	0	0	0	0	0	0	0	0	0	1	1	0	1	0	0	0	0	0	0	3	4	784
4.05	0	3.21	111.9	0.56	5.21	8.1	2	329.2	0.54	0	54	0	0	0	0	0	0	0	0	0	1	0	1	0	0	0	0	0	0	0	0	6	11.23	213
7.9	0	4.23	117	3.33	5.36	9.01	6	421	0.52	0	37	0	0	0	0	0	0	0	0	0	0	1	1	0	0	0	0	1	0	0	0	3	7.78	346
6.7	0	3.58	116	3.71	5.7	15.2	22	320	0.42	0	9	0	0	0	0	0	0	0	0	1	0	1	1	0	0	0	0	0	0	1	0	3	2.6	1127
6.4	0	4.85	144	0.9	5.7	11.67	15	953	0.79	15.54	37	0	0	0	0	0	0	0	0	0	0	1	1	0	0	0	0	0	0	0	0	7	4.6	572
7.5	0	5.2	124	3.1	5.08	12.5	2	469.2	0.34	0	27	0	0	0	0	0	0	0	0	0	0	1	1	0	1	0	0	0	1	0	0	7	16.18	225
4.7	0	3.6	115	1.79	6.35	9.62	2	235.3	0.54	0	52	0	0	0	0	0	0	0	0	0	0	1	1	0	0	0	0	0	0	0	0	5	11.5	928.8
16.3	0	4.36	133	2.1	5.67	9.48	0	249.7	0.58	0	31	0	0	0	0	0	0	0	0	0	0	1	1	0	0	0	0	0	0	0	0	4	6.69	432
9.78	0	4.84	139.6	0.66	6.97	8.5	2	473.9	0.46	3.94	53	0	1	0	0	0	0	0	0	0	0	1	1	0	0	0	0	0	0	0	0	6	13.26	834
4.9	0	4.28	129	2.1	5.54	11.81	2	322	0.7	0.61	24	0	0	0	0	0	0	0	0	0	0	1	1	0	0	0	0	0	0	0	0	3	8.1	456
6.7	0	3.98	125	1.88	5.5	6.52	4	280.6	0.52	0	30	0	0	0	0	0	0	0	0	1	0	1	1	0	0	0	0	0	0	1	0	3	16.09	842
5.9	0	3.97	114	2.05	5.5	15.35	20	423.8	0.63	3.61	36	0	0	0	0	0	0	0	0	0	0	0	1	0	0	0	0	0	0	0	0	3	12.4	1012
2.6	0	3.84	79	1.16	5.71	10.22	2	1211.4	0.53	-1.48	48	1	0	0	0	0	0	0	0	0	0	1	1	0	0	0	0	1	0	0	1	4	5.26	632
5.48	0	4.82	146	0.49	6.35	27.36	60	505.8	0.43	5.4	15	1	0	0	0	0	0	0	0	0	0	1	1	0	1	0	0	0	0	0	0	2	6.1	397
4	0	3.92	124	1.79	5.6	14.24	2	536.2	0.51	0.88	54	0	0	0	0	0	0	0	0	0	0	1	1	0	0	0	0	0	0	0	0	4	6.28	538
6.1	0	4.37	133	0.71	5.76	4.67	12	613.5	0.46	0	50	0	0	0	0	0	0	0	0	0	0	0	1	0	0	0	0	0	0	1	0	4	11.4	284
10.4	0	5.8	111	3.07	6.6	3.55	10	254.6	0.34	1.27	26	0	0	0	0	0	0	0	0	0	0	0	1	0	0	0	0	0	0	1	1	4	1.7	845
5.1	0	5.13	161	1.9	5.3	10.2	8	717.6	0.01	0	27	1	0	0	0	0	0	0	0	0	0	1	1	0	0	0	0	1	0	0	0	6.5	7.24	573
3.3	0	4.22	129	1.3	5.6	12.45	2	256	0.71	0.39	13	0	0	0	0	0	0	0	0	0	0	1	1	0	0	0	0	0	0	0	0	2	3.51	466
